# Supplementary material
Source: PubMed Central journal article supplement (PMC4613453)

Supplementary figures and legends

Fig. S1. (A) Localization of GFP-EML4-N during mitosis in the presence of endogenous EML4 (Scale bar = 5  $\mu$ m). (B) Interaction of EML4 deletion mutants and full length EML4.

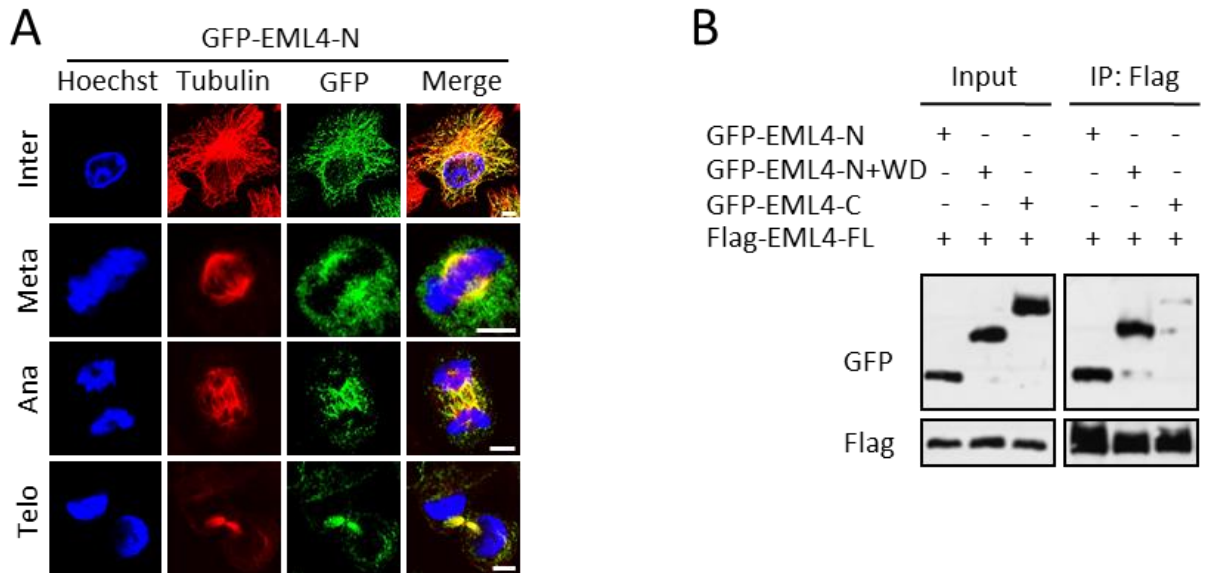

Fig. S2. HeLa cells were transfected with the indicated siRNAs and 72 h later, cells were fixed and immunostained with anti- $\alpha$ -tubulin antibody and Hoechst (Scale bar = 1  $\mu$ m).

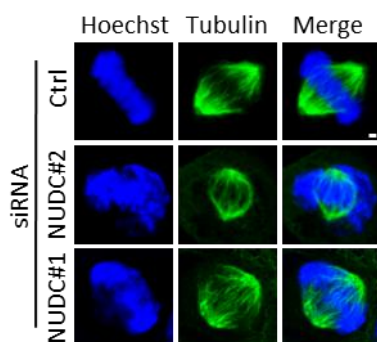

Supplement: kccy-14-10-1026514-s001.pdf [file kccy-14-10-1026514-s001.pdf]
